# Supplementary material for: H2S promotes developmental brain angiogenesis via the NOS/NO pathway in zebrafish
Source: PubMed Central journal article supplement — Stroke Vasc Neurol. 2020 Nov 27;6(2):244–51. doi: 10.1136/svn-2020-000584 (PMC8258041; doi:10.1136/svn-2020-000584), 2020-11-27
Supplement: svn-2020-000584supp001.pdf [file svn-2020-000584supp001.pdf]

1

**Supplemental Material**

2

3 **H<sub>2</sub>S promotes developmental brain angiogenesis via the NOS/NO pathway in zebrafish**

4

5 **SUPPLEMENTARY FIGURES AND LEGENDS**

6

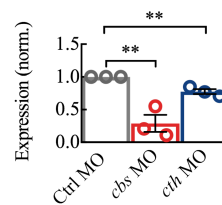7 **Figure S1. Expression of *cbs* and *cth* in zebrafish larvae was efficiently downregulated by**8 ***cbs* MO and *cth* MO, respectively.** Summary of Western blot analyses. Error bars, SEM. \*\**P*9 **< 0.01 (unpaired two-tailed Student's *t*-test).**

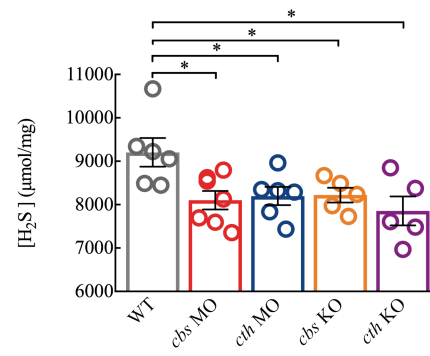

10

11 **Figure S2. Production of H<sub>2</sub>S in *cbs* and *cth* morphants and mutants was significantly**  
12 **reduced.** The experiments were repeated 3 times. At least 3 samples were analyzed in each  
13 group at each time. Error bars, SEM. \**P* < 0.05 (unpaired two-tailed Student's *t*-test).

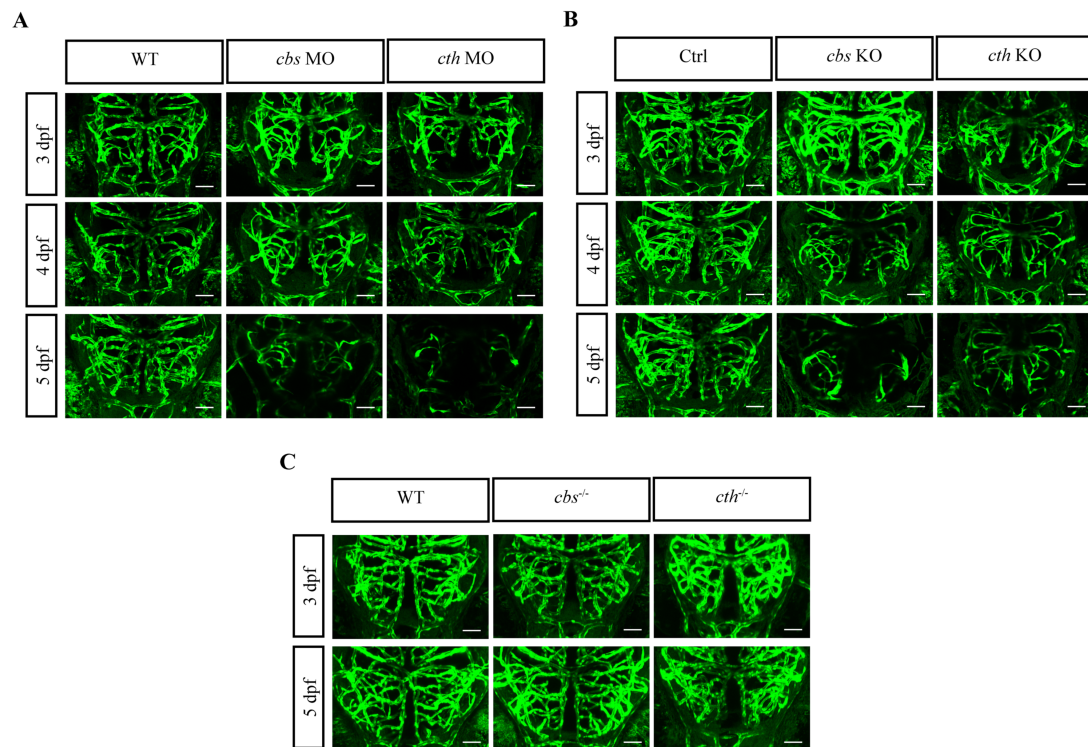

14

15 **Figure S3. Representative brain vasculature long-term serial confocal images taken from**16 ***Tg(Flk1:eGFP)* larvae at 3 - 5 dpf.**17 (A) Representative projected confocal images taken from *cbs* or *cth* morphants.18 (B) Representative projected confocal images taken from *cbs* or *cth* F0 mutant larvae.19 (C) Representative projected confocal images taken from *cbs* or *cth* homo-mutant larvae.

20 Confocal images were taken at 3 - 5 dpf of the same larva (A - C).

21 Scale bar, 50  $\mu$ m (A - C).

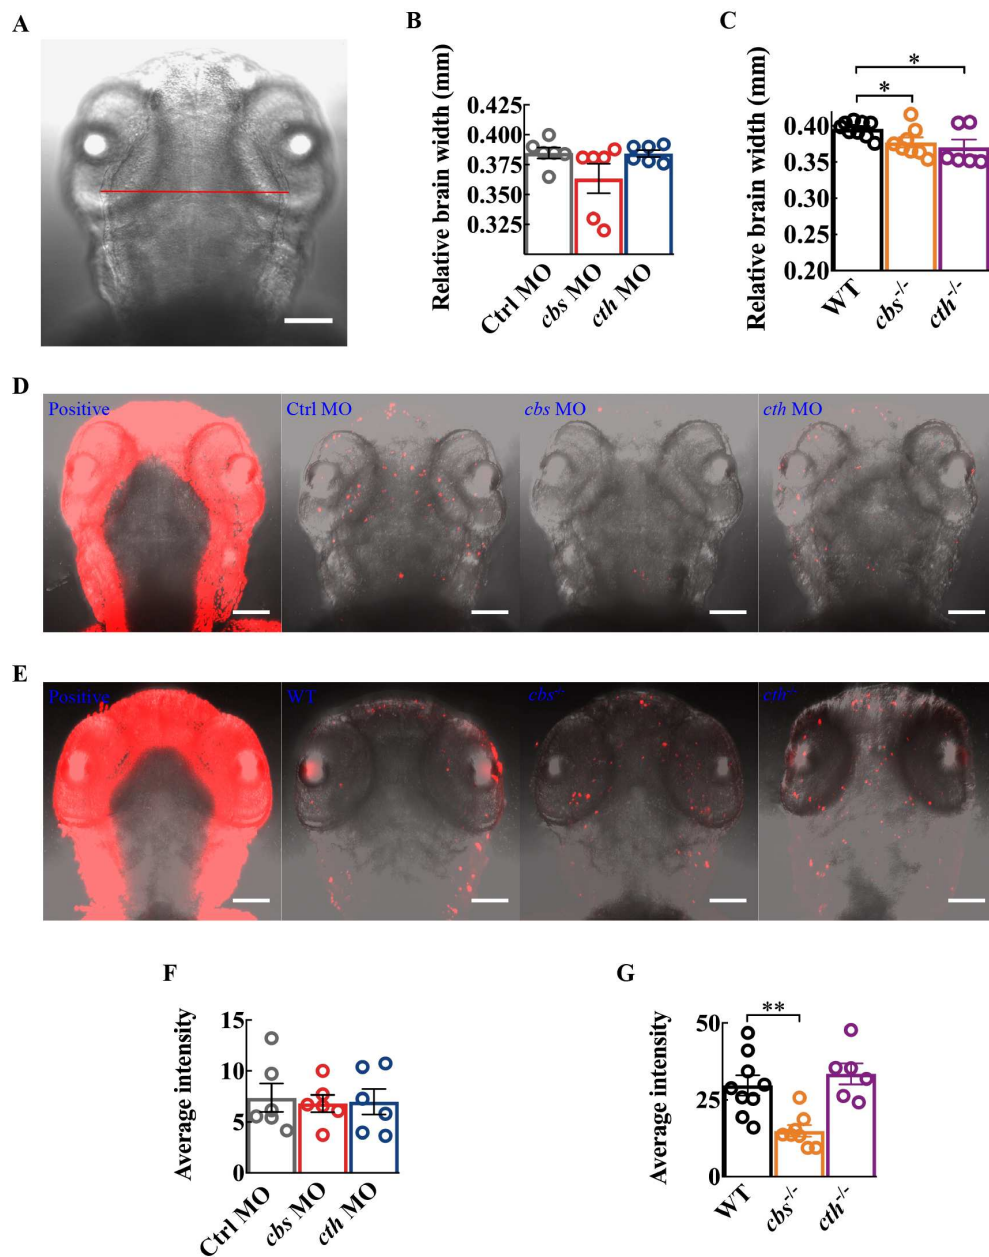

22

23 **Figure S4. Brain size and cell apoptosis in *cbs* or *cth* morphants and homo-mutants.**

24 (A) Image of a 3-dpf larva showing the measurement of brain size, with the width of the optic  
 25 tectum delineated with a red line as relative brain width. (B and C) Summary of the relative  
 26 brain width of *cbs* or *cth* morphants (B) and homo-mutants (C). (D and E) Representative  
 27 projected confocal images of TUNEL signals. (D) From left to right: positive control, Ctrl MO,

28 *cbs* MO, *cth* MO. (E) From left to right: positive control, WT, *cbs*<sup>-/-</sup>, *cth*<sup>-/-</sup>. (F and G) Summary  
29 of average TUNEL signal intensity of *cbs* or *cth* morphants (F) and homo-mutants (G).  
30 Scale bar, 100 μm (A, D, E). Error bars, SEM. \**P* < 0.05, \*\**P* < 0.01 (unpaired two-tailed  
31 Student's t-test).

*cbs*  
WT: 5'-TTCCGTTGAAGACATCGTCAGCATCCCCGT-3'  
Mut-1: 5'-TTCCGTTG-----ACATCGTCAGCATCCCCGT-3' -3  
Mut-2: 5'-TTCCGTTGAAGACAT-ATGCGCATCCCCGT-3' -5, +4

*cth*  
WT: 5'-ATCCACGTTGGTTCAGAGCCCGAGCAGTGG-3'  
Mut-1: 5'-ATCCACG-----AACAGAGCCCGAGCAGTGG-3' -6, +2  
Mut-2: 5'-ATCCAC-----TTCAGAGCCCGAGCAGTGG-3' -5  
Mut-3: 5'-ATCCA-----GTTTCAGAGCCCGAGCAGTGG-3' -5  
Mut-4: 5'-ATCCACGTTCTGTTTCAGAGCCCGAGCAGTGG-3' -1, +1  
Mut-5: 5'-ATCCACGT-----CGATTCCGAGCAGTGG-3' -11, +5  
Mut-6: 5'-ATCCACGTTG-AAATCAGAGCCCGAGCAGTGG-3' -2, +2

32

33 **Figure S5. Mutations of the *cbs* and *cth* F0 mutants.** All the indel mutations are highlighted

34 in yellow, and sgRNA target sequences are shown in red.

*cbs*  
WT: 5'-CTGCAGAGGAGATCCTGGAGCAGTGTGGCGGTA-3'  
Mut: 5'-CTGCAGAGGAGATCCTGGAG--GATCCTGGGATCC -3, +13  
TGTGGCGGTA-3'

*cth*  
WT: 5'-GGTCTGGCTGTTGCCTCTGGATTGGCGGCAACT-3'  
Mut: 5'-GGTCTGGCTGTTGCCTC-----TGGCGGCAACT-3' -5

35

36 **Figure S6. Mutations of the *cbs* and *cth* homo-mutants.** All the indel mutations are

37 highlighted in yellow.

A

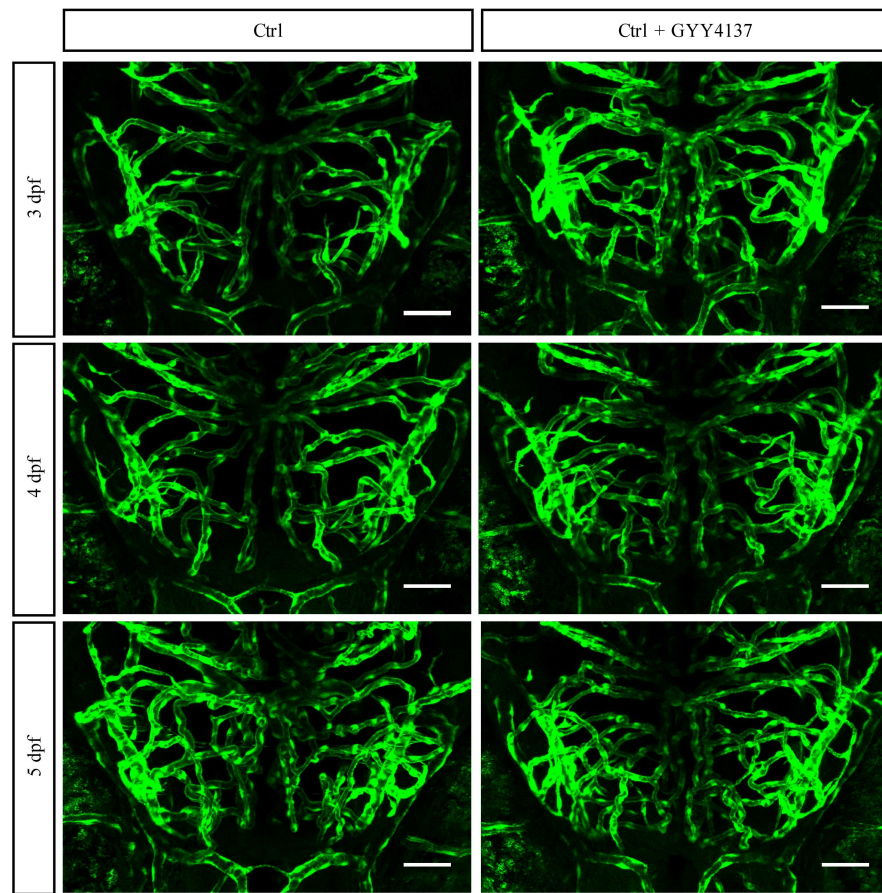

B

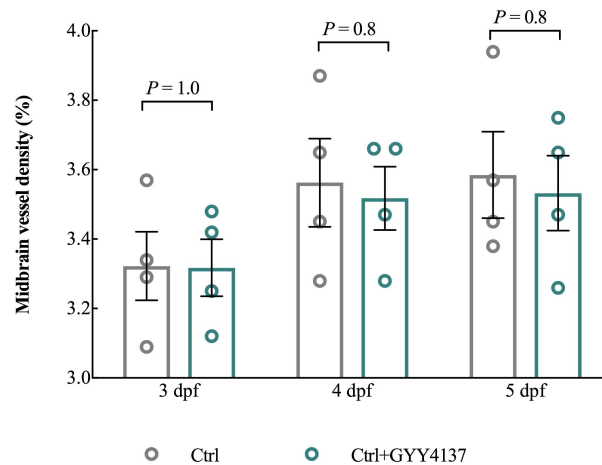

38

39 **Figure S7. GYY4137 did not change the midbrain vessel density of the control fish.**



40 (A) Representative projected confocal images showing that GYY4137 treatment did not change  
41 the midbrain vessel density of the Ctrl fish. Confocal images were taken at 3 - 5 dpf of the same  
42 larva.

43 (B) Summary of the midbrain vessel density of Ctrl fish and fish treated with GYY4137. Four  
44 embryos were examined for each group.

45 Scale bar, 50  $\mu\text{m}$  (A). Error bars, SEM. (unpaired two-tailed Student's t-test for B).

46

47 **SUPPLEMENTARY METHODS**

48

49 **Zebrafish husbandry**

50 The adult zebrafish (*Dario rerio*) were maintained with an automatic fish housing system at  
51 28°C following standard protocols. Zebrafish embryos and larvae were raised in 10% Hanks'  
52 solution[1] under a 14 h-10 h light-dark cycle, and 0.003% 1-phenyl-2-thiourea (PTU) (Sigma,  
53 P7629) was added to the Hanks' solution since 24 hpf to prevent pigment formation. The  
54 Tg(Flk1:eGFP) zebrafish were described previously[2]. Euthanasia was performed by rapid  
55 freezing.

56

57 **Western blotting**

58 Protein sample preparation and western blotting were performed as previously described[1].  
59 Protein sample preparation was conducted at 3 dpf. The primary antibodies were anti-CBS  
60 (Aviva, ARP45746\_T100), anti-CTH (Santa Cruz, sc-374249), anti-VEGF (R&D, MAB1247),  
61 anti-β-actin (Immunoway, YT0099) anti-ERK1/2 (Cell Signaling, 9107), and anti-p-ERK1/2  
62 (Cell Signaling, 4370).

63

64 **RNA preparation and Real-time PCR**

65 Total RNAs of zebrafish embryos were extracted by using TRIzol reagent according to the  
66 manufacturer's instructions (Invitrogen, 15596018). The extracted total RNA was used to  
67 generate the first-strand cDNA by using PrimeScript reverse transcriptase (Takara, 2680A)  
68 with random primer. The real-time PCR with SYBR Premix Ex Taq II (Takara) was performed

69 on the cDNA to detect the relative expression of *nos1*, *nos2a*, and *nos2b*. The relative RNA  
70 amount was calculated with the  $\Delta\Delta\text{Ct}$  method and normalized with  $\beta$ -actin (*actb1*) expression  
71 (as an internal control). The primers used for real-time PCR are as follows.

72 *nos1* primers:

73 forward: 5'-ACACAGTGGATCTGGAGCAC-3'

74 reverse: 5'-GCCGCACCAAATTTCTCTCC-3'

75 *nos2a* primers:

76 forward: 5'-AACATTTTGGAGCGCGTTGG-3'

77 reverse: 5'-CGGCAACATTGATAGCCACG-3'

78 *nos2b* primers:

79 forward: 5'-AAGCCCCGACTCTACTCCAT-3'

80 reverse: 5'-TGGACCTTTTCCCTCCTGTG-3'

81 *actb1* primers:

82 forward: 5'-AAGCCCCGACTCTACTCCAT-3'

83 reverse: 5'-TGCTCAATGGGGTATTTGAGGG-3'

84

### 85 **Measurement of H<sub>2</sub>S production**

86 Total H<sub>2</sub>S production in the zebrafish larvae was examined at 3 dpf with the H<sub>2</sub>S measurement  
87 kit (Sino Best Biological Technology, YX-C-C000). Protein samples were extracted with the  
88 extraction buffer and then mixed with solution I - IV. Absorbance at 665 nm was measured  
89 and total H<sub>2</sub>S production was calculated according to the provided formula.

90

91 **Whole-mount TUNEL assay**

92 Zebrafish embryos at 3 dpf were fixed in 4% paraformaldehyde (PFA) overnight at 4 °C.  
93 Genotyping of mutant larvae was conducted before they were fixed with PFA. TUNEL staining  
94 was conducted using the *In Situ* Cell Death Detection Kit, TMR red (Roche Diagnostics GmbH,  
95 12156792910). Procedures were performed as previously described[3]. The dorsal view of  
96 whole-mounts with Z stack (3 µm per step) images were captured with an Olympus Fluoview  
97 1000 confocal microscope (Olympus, Japan). XLumplfl 20× (W/IR; NA, 0.95) objective lenses  
98 were used. Raw images were processed with ImageJ.

99

100 **Brain size measurement**

101 Since larval brains are too small to be dissected and weighed, we measured the width of the  
102 optic tectum from dorsal confocal images using ImageJ. The width of the optic tectum predicts  
103 the mass of the brain with 79% accuracy in zebrafish[4], thus the measurement is regarded as  
104 a predictor of overall brain size[5].

105

106 **REFERENCES**

- 107 [1] Xu B, Zhang Y, Du XF, et al. Neurons secrete miR-132-containing exosomes to regulate  
108 brain vascular integrity. *Cell Res* 2017;27(7):882-97.  
109 [2] Roman BL, Pham VN, Lawson ND, et al. Disruption of *acvr1l* increases endothelial cell  
110 number in zebrafish cranial vessels. *Development* 2002;129(12):3009-19.  
111 [3] Du W-J, Zhang R-W, Li J, et al. The Locus Coeruleus Modulates Intravenous General  
112 Anesthesia of Zebrafish via a Cooperative Mechanism. *Cell reports* 2018;24(12).  
113 [4] Näslund J. A simple non-invasive method for measuring gross brain size in small live fish  
114 with semi-transparent heads. *PeerJ* 2014;2:e586.  
115 [5] Chen Y-C, Harrison PW, Kotrschal A, et al. Expression change in Angiopoietin-1 underlies

116 change in relative brain size in fish. *Proceedings Biological sciences* 2015;282(1810).

117
